# Supplementary material for: Achieving strong low-frequency electromagnetic absorption in tellurium nanowires
Source: Royal Society of Chemistry journal article supplement (doi:10.1039/d5tc00588d), 2025-01-01
Supplement: d5tc00588d1.pdf [file d5tc00588d1.pdf]

## **Supporting Information**

### **Achieving strong low-frequency electromagnetic absorption in tellurium nanowires**

Yuanyuan Zhou, Gaoyuan Yu, Litao Lin and Xiaogu Huang \*

School of Chemistry and Materials Science, Nanjing University of Information  
Science & Technology, Nanjing 210044, China

\*Corresponding Author:

Xiaogu Huang, Email: [hxg@nuist.edu.cn](mailto:hxg@nuist.edu.cn)

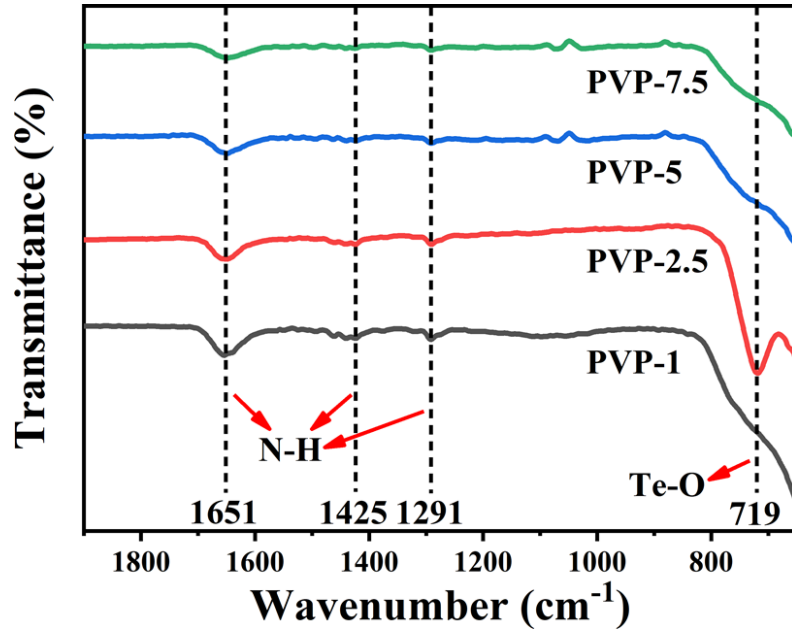

**Fig. S1.** The Fourier Transform Infrared spectroscopy of the products.

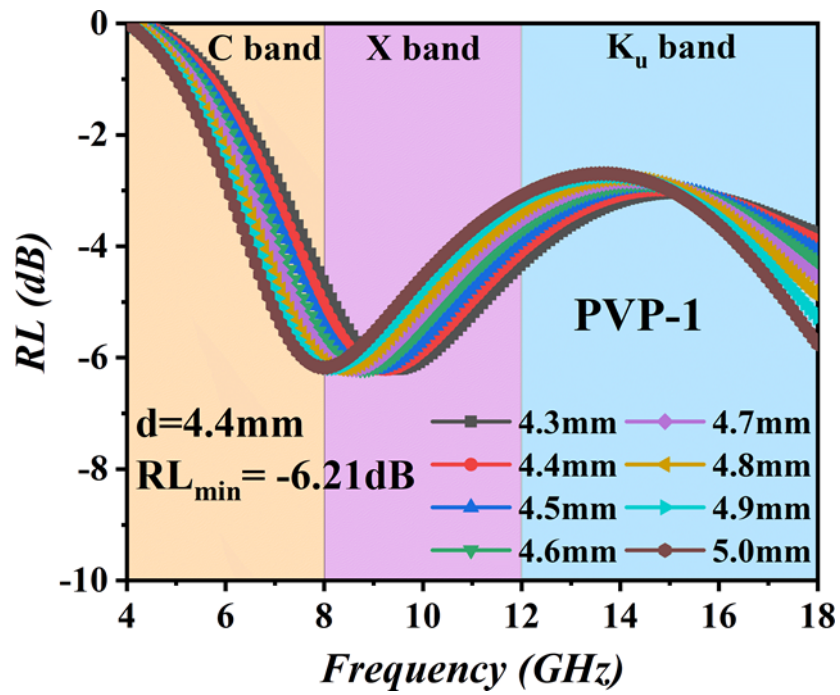

**Fig. S2.** 2D RL images of PVP-1.

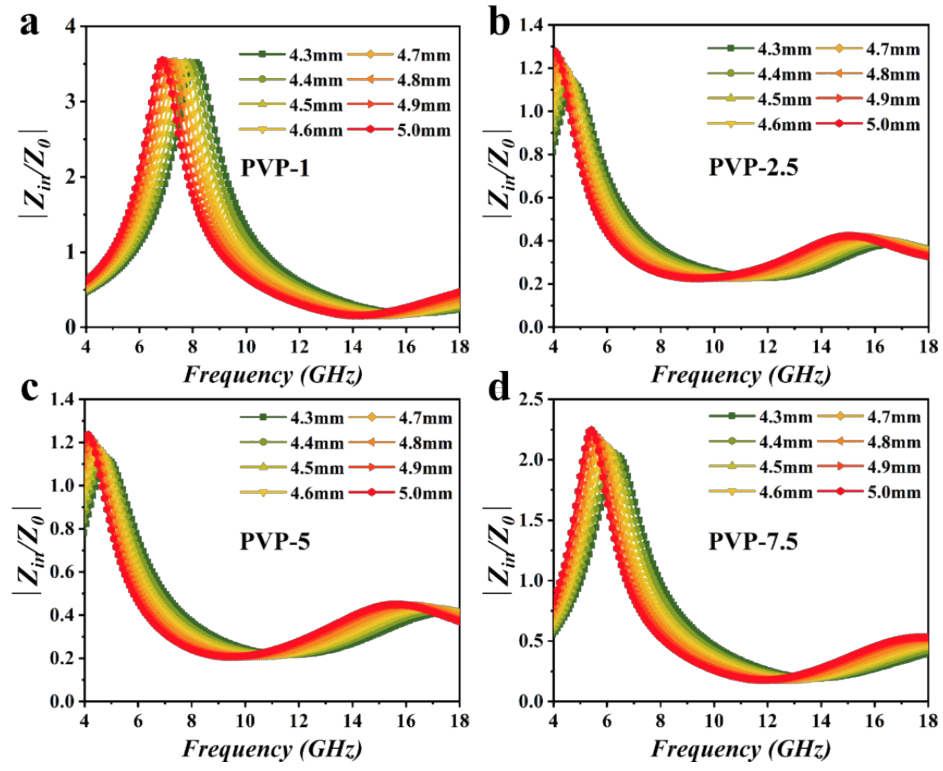

**Fig. S3.** Impedance matching for the products.
